# Supplementary material for: Motor competence of children in Singapore using Movement ABC-2 test
Source: PeerJ. 2024 Dec 5;12:e18446. doi: 10.7717/peerj.18446 (PMC11660857; doi:10.7717/peerj.18446)
Supplement: Supplemental Information 1 [file peerj-12-18446-s001.xlsx]

## Sheet: MABC2 SG data
Subjects	Gender	Report Age	RSMD1	RSMD2	RSMD3	RSAC1	RSAC2	RSBAL1	RSBAL2	RSBAL3
1	F	3	17	58	3	0	1	3	14	5
2	F	3	14	49	8	0	5	5	15	5
3	F	3	14	24	2	5	4	15	15	5
4	F	3	15	32	3	1	6	4	10	4
5	F	3	16	39	2	5	4	7	15	5
6	F	3	9	53	0	2	6	28	13	5
7	F	3	10	56	4	4	5	6	1	3
8	F	3	14	42	4	0	0	2	4	5
9	F	3	13	64	5	3	1	4	7	1
10	F	3	15	40	1	4	4	2	15	5
11	F	3	11	45	4	3	1	2	15	5
12	F	3	15	48	14	3	1	5	7	2
13	F	3	11	35	7	3	2	6	15	4
14	F	3	13	40	4	3	0	22	11	5
15	F	3	12	43	12	1	4	5	9	5
16	F	3	15	34	0	5	3	1	15	5
17	F	3	8	18	1	8	5	16	15	5
18	F	3	16	59	9	0	1	10	6	5
19	F	3	17	43	5	0	1	22	9	5
20	F	3	15	31	3	5	2	13	15	5
21	F	3	18	53	6	2	0	8	3	3
22	F	3	13	35	3	3	0	10	15	5
23	F	3	14	50	2	5	1	5	8	5
24	F	3	13	34	0	9	8	10	12	4
25	F	3	12	36	0	4	2	10	5	4
26	F	3	13	40	3	1	4	16	15	5
27	F	4	12	33	0	7	5	9	15	5
28	F	4	11	26	0	6	6	21	15	5
29	F	4	10	25	1	5	5	7	15	5
30	F	4	11	26	3	4	3	3	8	5
31	F	4	11	38	0	5	4	7	15	5
32	F	4	11	20	3	3	0	13	7	4
33	F	4	23	49	2	6	4	13	4	5
34	F	4	11	33	1	4	4	9	15	5
35	F	4	12	28	1	1	5	17	15	5
36	F	4	13	33	3	3	2	4	6	3
37	F	4	14	35	1	5	1	25	15	5
38	F	4	15	56	11	0	0	1	1	1
39	F	4	18	66	8	0	0	1	1	1
40	F	4	12	41	1	3	4	6	6	5
41	F	4	12	44	0	1	1	5	15	5
42	F	4	12	33	1	7	6	9	15	5
43	F	4	12	32	2	4	6	14	15	5
44	F	4	14	42	3	2	5	6	15	5
45	F	4	12	24	0	6	4	18	15	5
46	F	4	12	28	2	6	5	18	15	5
47	F	4	12	29	0	7	4	25	15	5
48	F	4	9	26	1	5	3	28	15	5
49	F	4	9	23	0	1	5	11	15	5
50	F	4	10	51	4	5	1	10	7	5
51	F	4	11	40	0	7	4	5	10	5
52	F	4	10	31	1	4	7	15	5	4
53	F	4	14	36	2	0	1	2	8	5
54	F	4	11	53	0	1	2	17	13	4
55	F	5	16	43	0	6	4	16	15	5
56	F	5	19	39	0	5	5	30	15	5
57	F	5	22	51	0	4	3	20	15	5
58	F	5	19	70	0	5	6	12	15	5
59	F	5	21	67	0	3	5	30	9	5
60	F	5	18	39	3	9	5	29	15	5
61	F	5	17	35	1	6	4	30	15	5
62	F	5	23	59	0	8	6	7	3	5
63	F	5	21	53	0	5	3	15	15	5
64	F	5	19	42	1	10	3	30	15	5
65	F	5	21	45	1	6	4	30	15	5
66	F	5	18	56	0	6	7	25	15	5
67	F	5	24	86	1	4	4	7	15	5
68	F	5	23	52	2	5	4	8	15	5
69	F	5	20	54	1	3	8	8	15	3
70	F	5	20	60	0	6	3	30	15	5
71	F	5	22	38	0	6	6	30	15	5
72	F	5	20	58	1	6	6	30	15	5
73	F	5	19	38	0	7	6	26	15	5
74	F	5	19	46	0	6	1	30	15	5
75	F	5	21	49	1	5	10	24	15	5
76	F	5	17	41	0	6	7	23	15	5
77	F	5	21	42	0	9	6	29	15	5
78	F	5	20	43	0	8	6	22	15	5
79	F	5	23	60	2	3	3	6	15	5
80	F	6	19	45	4	7	4	23	15	5
81	F	6	17	39	0	8	6	30	15	5
82	F	6	18	38	2	9	6	30	15	5
83	F	6	19	43	2	9	9	30	15	5
84	F	6	18	48	0	9	6	30	15	5
85	F	6	21	67	0	7	2	24	15	5
86	F	6	17	39	0	0	4	18	15	5
87	F	6	21	41	0	7	3	27	15	3
88	F	6	21	55	2	5	6	30	15	5
89	F	6	20	55	0	7	3	30	15	5
90	F	6	19	49	0	7	3	30	15	4
91	M	3	12	42	4	0	2	11	7	5
92	M	3	15	50	11	1	4	8	15	5
93	M	3	16	35	4	0	2	2	15	5
94	M	3	15	75	3	1	4	4	9	5
95	M	3	16	60	2	3	2	5	15	5
96	M	3	14	53	2	7	4	5	12	5
97	M	3	16	56	6	0	2	7	11	5
98	M	3	16	46	2	5	2	6	8	5
99	M	3	15	68	14	0	0	2	1	2
100	M	3	13	50	2	1	6	4	12	5
101	M	3	17	50	7	3	1	5	8	5
102	M	3	11	34	4	4	2	5	13	5
103	M	3	17	95	7	0	2	3	5	5
104	M	3	13	47	7	1	4	4	15	5
105	M	3	12	58	1	4	7	7	15	5
106	M	3	13	59	0	7	1	15	15	5
107	M	3	23	143	16	2	2	3	3	2
108	M	3	14	57	11	0	1	8	11	5
109	M	3	16	39	1	0	2	18	13	5
110	M	3	14	38	9	3	2	2	8	3
111	M	3	13	59	8	5	4	6	7	5
112	M	3	17	42	2	5	0	2	7	3
113	M	3	13	36	0	3	4	6	10	5
114	M	3	14	50	3	7	5	11	15	5
115	M	3	17	66	3	2	0	2	8	3
116	M	3	17	79	3	0	4	2	8	5
117	M	4	14	36	1	5	2	4	15	5
118	M	4	11	27	2	6	7	11	15	5
119	M	4	10	33	0	7	5	24	15	5
120	M	4	12	32	0	8	8	18	15	5
121	M	4	13	51	5	6	5	5	12	5
122	M	4	11	46	1	3	6	4	15	5
123	M	4	14	27	2	5	4	2	15	5
124	M	4	14	52	6	1	3	3	11	5
125	M	4	21	47	0	0	5	8	15	5
126	M	4	12	46	0	7	4	26	15	5
127	M	4	11	24	1	2	5	6	15	5
128	M	4	13	31	1	3	3	9	15	5
129	M	4	14	29	4	3	1	4	8	4
130	M	4	12	31	6	5	2	4	7	5
131	M	4	13	33	1	8	2	5	10	4
132	M	4	10	35	0	7	4	30	15	5
133	M	4	12	36	2	5	3	5	15	5
134	M	4	12	29	0	0	4	8	10	5
135	M	4	11	50	4	6	3	4	15	5
136	M	4	13	47	1	5	3	8	5	4
137	M	4	13	53	0	1	2	4	15	5
138	M	4	11	41	0	3	6	7	11	5
139	M	4	13	44	6	4	4	1	5	5
140	M	4	10	39	7	1	4	3	3	2
141	M	4	9	38	2	6	7	7	15	5
142	M	4	10	40	3	4	4	15	12	5
143	M	5	19	39	0	8	4	30	15	5
144	M	5	19	56	0	1	3	10	15	5
145	M	5	19	54	1	10	9	30	15	5
146	M	5	21	60	3	9	8	22	15	5
147	M	5	18	47	0	3	4	14	15	5
148	M	5	16	43	2	8	3	30	15	5
149	M	5	22	45	1	2	5	28	15	5
150	M	5	22	57	0	5	3	27	15	5
151	M	5	20	52	5	3	2	17	15	5
152	M	5	20	43	1	8	1	30	15	5
153	M	5	19	55	2	4	4	10	13	5
154	M	5	21	38	3	6	7	7	15	2
155	M	5	22	56	0	7	6	25	13	5
156	M	5	21	63	3	4	6	28	15	5
157	M	5	20	53	1	7	3	17	13	5
158	M	5	21	54	1	5	4	30	15	5
159	M	5	23	55	3	8	7	12	15	5
160	M	5	18	38	0	2	5	30	9	5
161	M	5	20	58	2	4	5	30	15	5
162	M	5	25	70	2	6	4	13	15	5
163	M	5	23	77	0	5	4	19	10	5
164	M	5	23	54	0	6	1	11	15	5
165	M	5	21	60	0	7	7	30	15	5
166	M	6	19	45	0	8	7	30	15	5
167	M	6	19	36	0	10	6	30	15	5
168	M	6	20	54	2	8	4	26	15	5
169	M	6	21	43	2	5	6	16	15	5
170	M	6	20	44	1	10	9	30	15	5
171	M	6	19	52	0	4	8	13	15	5
172	M	6	18	39	0	6	3	30	15	5
173	M	6	17	57	1	8	2	19	15	5
174	M	6	20	53	1	8	5	30	15	5
175	M	6	19	51	1	3	3	8	15	5
